# Supplementary material
Source: PubMed Central journal article supplement (PMC7773371)
Supplement: jci-131-140491-s049.pdf [file jci-131-140491-s049.pdf]

SUPPLEMENTARY MATERIAL

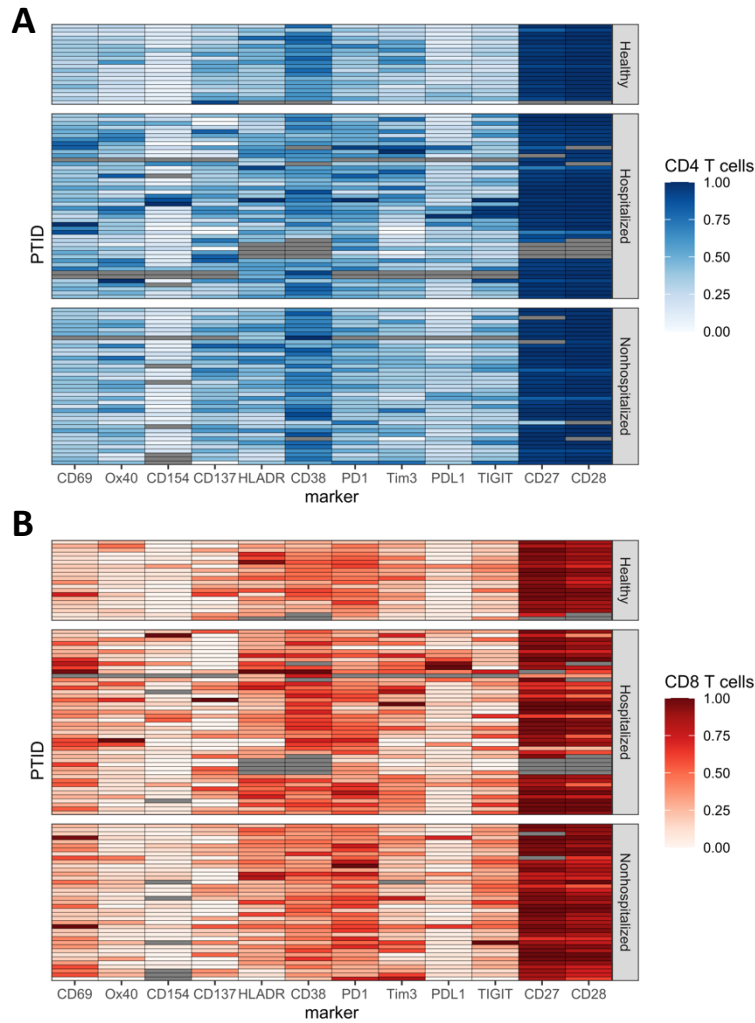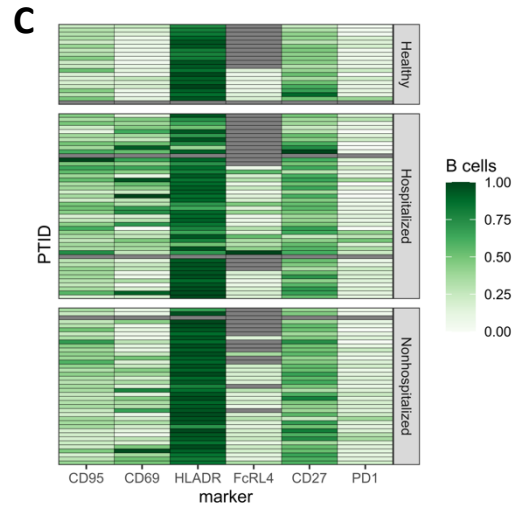

**Supplemental Figure 1: Activation and exhaustion markers on CD4 T cells, CD8 T cells, and B cells within each tested individual.** Heatmap showing relative frequencies of all activation and exhaustion markers tested on **A)** CD4+ T cells, **B)** CD8+ T cells, and **C)** B cells. Significant relationships are shown on Figures 2, 4, and 7, respectively. Each row represents one individual while each column shows specific markers under investigation. Grey cells indicate missing or excluded values.

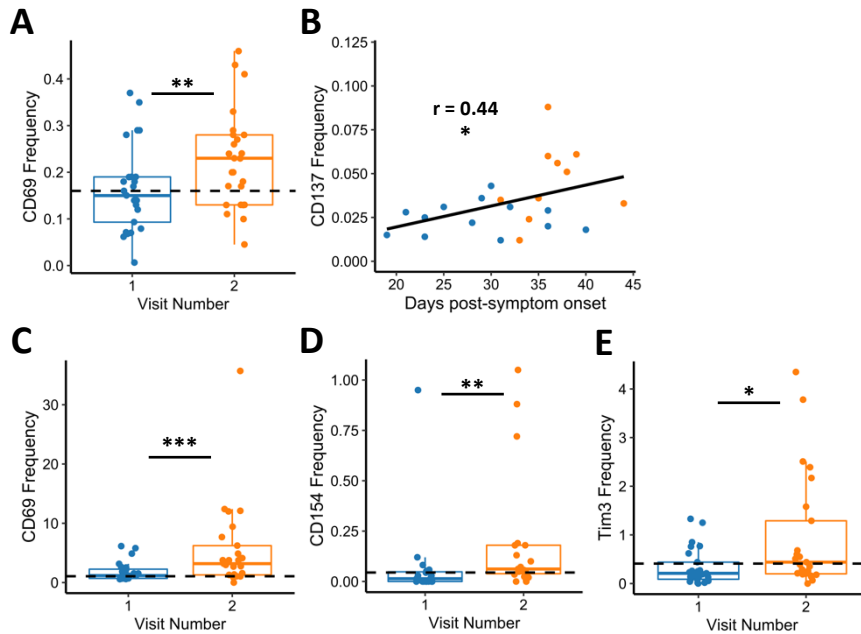

**Supplemental Figure 2: A)** CD4+ T-cell expression of CD69 is increased in non-hospitalized individuals between visit 1 and visit 2; **B)** CD137 expression increases within CD4+ T cells over time. **C-E)** CD8+ T-cell expression of the activation markers CD69, CD154, and Tim3, are higher at visit 2. Plots **A)** and **C-E)** show paired analysis of first versus second convalescent visits (n=25, Blue: visit 1, Orange: visit 2); p-values were determined by paired Wilcoxon signed-rank test. Boxplots indicate median, IQR, and 95% confidence interval. Dotted line shows median values of Healthy samples as baseline. Plot **B)** shows CD137 expression in CD4+ T cells by days post-symptom onset (n=23); p values determined by mixed effect model and relationship represented by linear regression. All p-values are indicated as follows: \*p≤0.05, \*\*p≤0.01, \*\*\*p≤0.001.

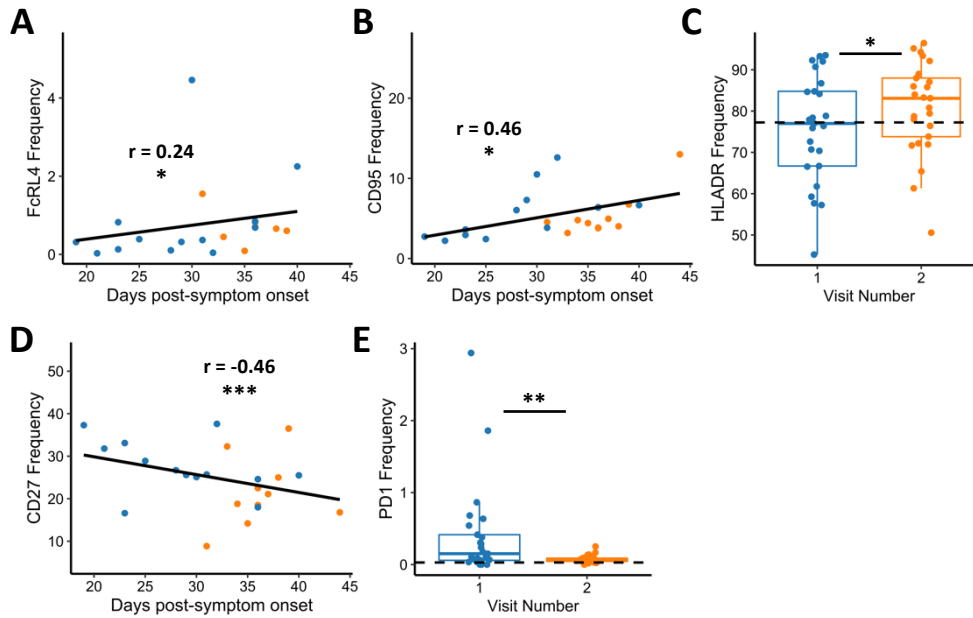

**Supplemental Figure 3: B cell activation and exhaustion over time in non-hospitalized individuals.** **A)** FcRL4 and CD95 frequencies increase over time based on days post-symptom onset (n=20; Blue: visit 1, Orange: visit 2), while **C)** HLA-DR frequencies increase between visit 1 and visit 2 (n=29); **D)** CD27 frequency decreases over time (n = 20; Blue: visit 1, Orange: visit 2), and **E)** decreased PD1 frequency decreased from visit 1 to visit 2 (n = 29). P-values for days post-symptom onset analysis determined by mixed effect model with relationship represented by linear regression; p-values for visit 1/visit 2 analyses determined by paired Wilcoxon signed-rank test. Boxplots indicate median, IQR, and 95% confidence interval. Dotted line shows median values of Healthy samples as baseline. All p-values are indicated as follows: \*p≤0.05, \*\*p≤0.01, \*\*\*p≤0.001.

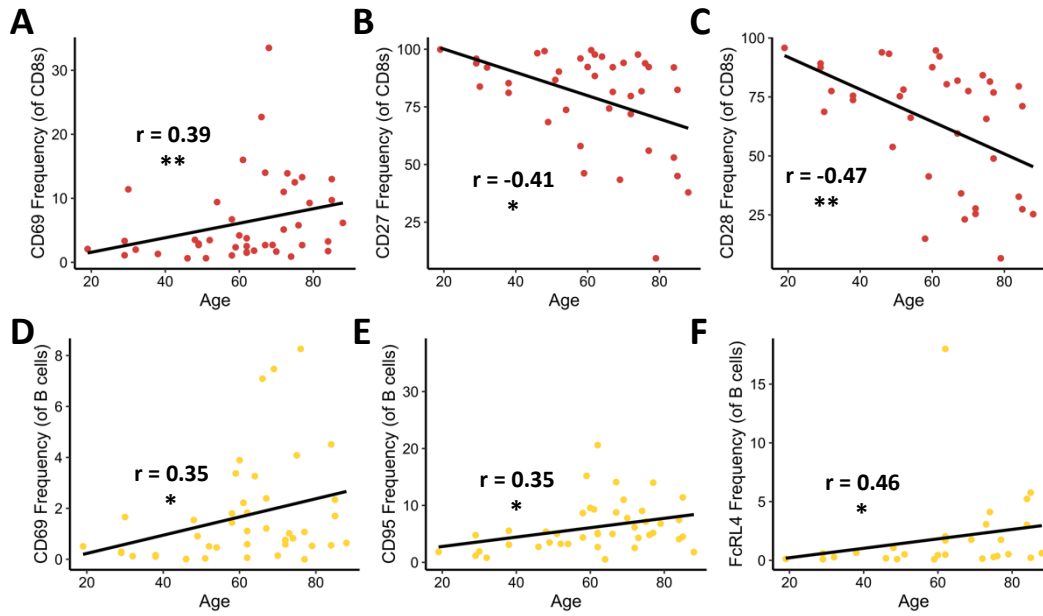

**Supplemental Figure 4: Correlations between CD8 T-cell and B-cell marker frequencies and age in hospitalized individuals.** Analysis of CD8+ T cells (red dots) shows **A**) positive correlation between CD69 expression and age, and **B-C**) negative correlations between CD27 and CD28 with age. Analysis of B cells (yellow dots) shows **D-F**) positive correlations between CD69, CD95 and FcRL4. R and p-values determined by Spearman rank correlation tests and are indicated as follows: \* $p \leq 0.05$ , \*\* $p \leq 0.01$ , \*\*\* $p \leq 0.001$ ;  $n = 45$ .

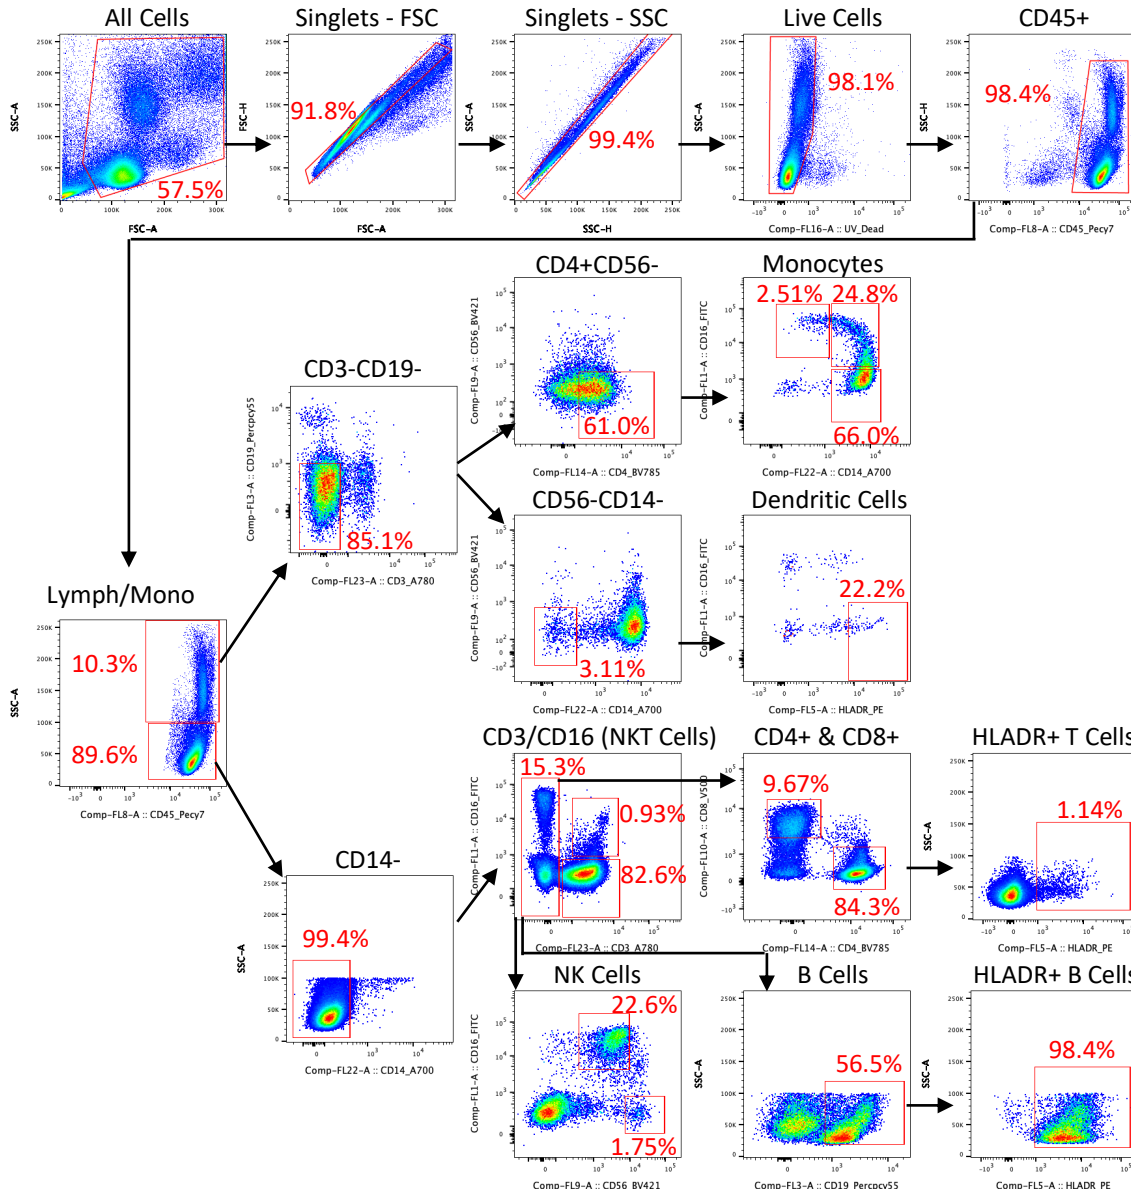

**Supplemental Figure 5: Immunophenotyping Gating Strategy**

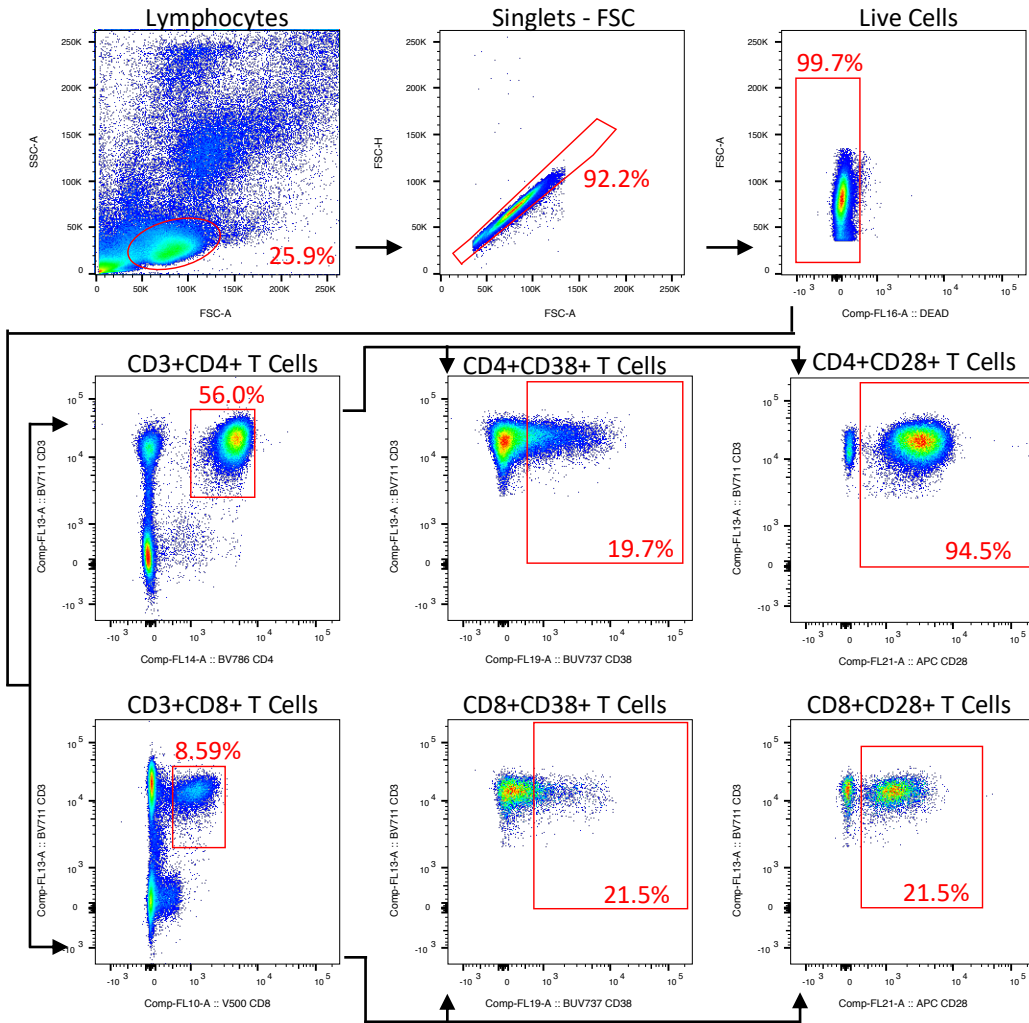

**Supplemental Figure 6: T-Cell Panel #1 Gating Strategy**

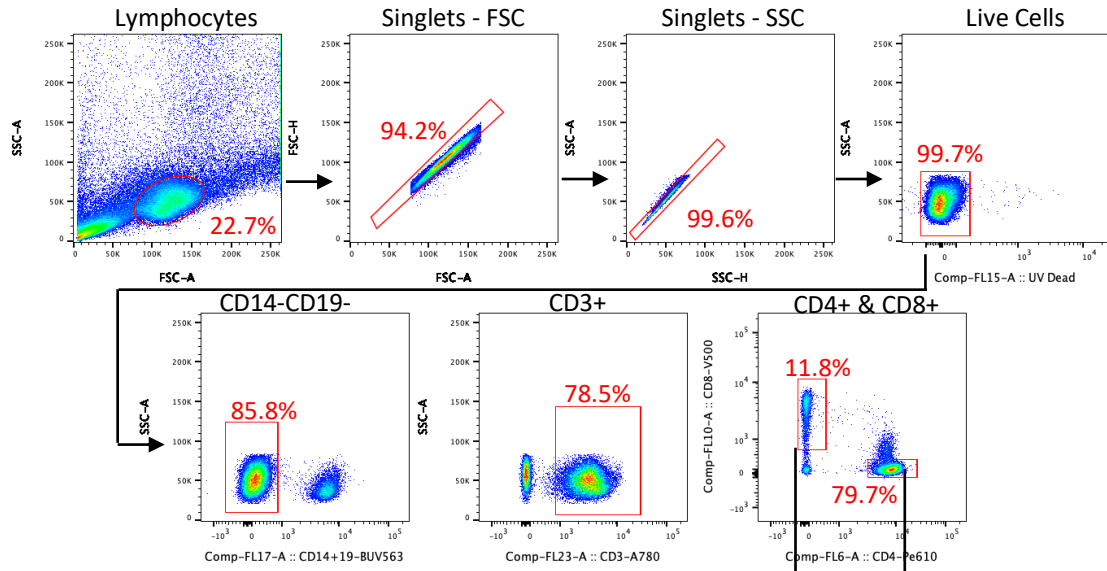

The below 8 markers were measured on both CD4/CD8 T cells

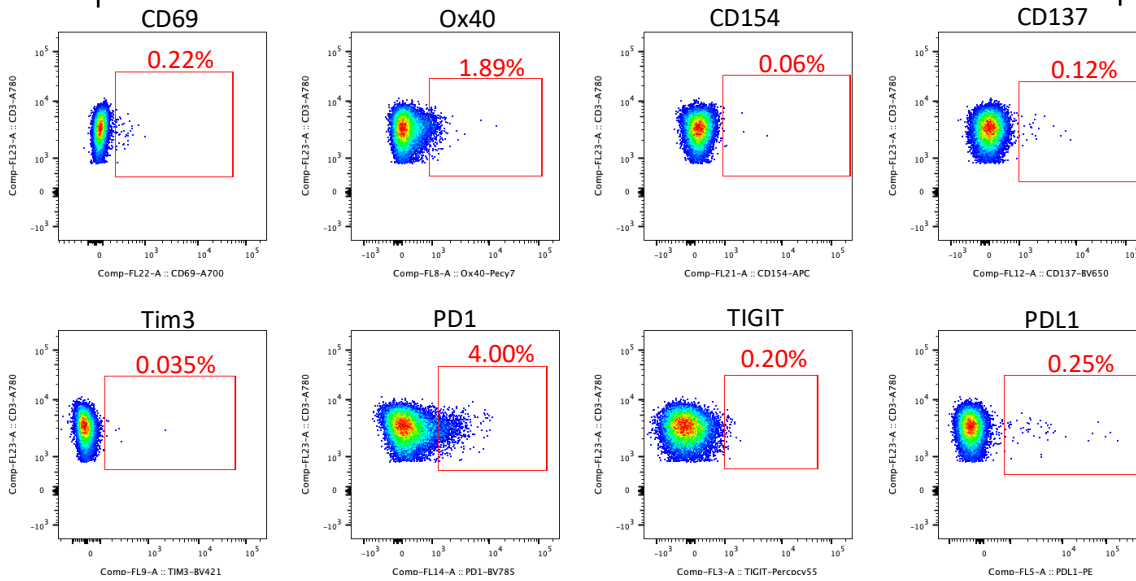

**Supplemental Figure 7: T-Cell Panel #2 Gating Strategy**

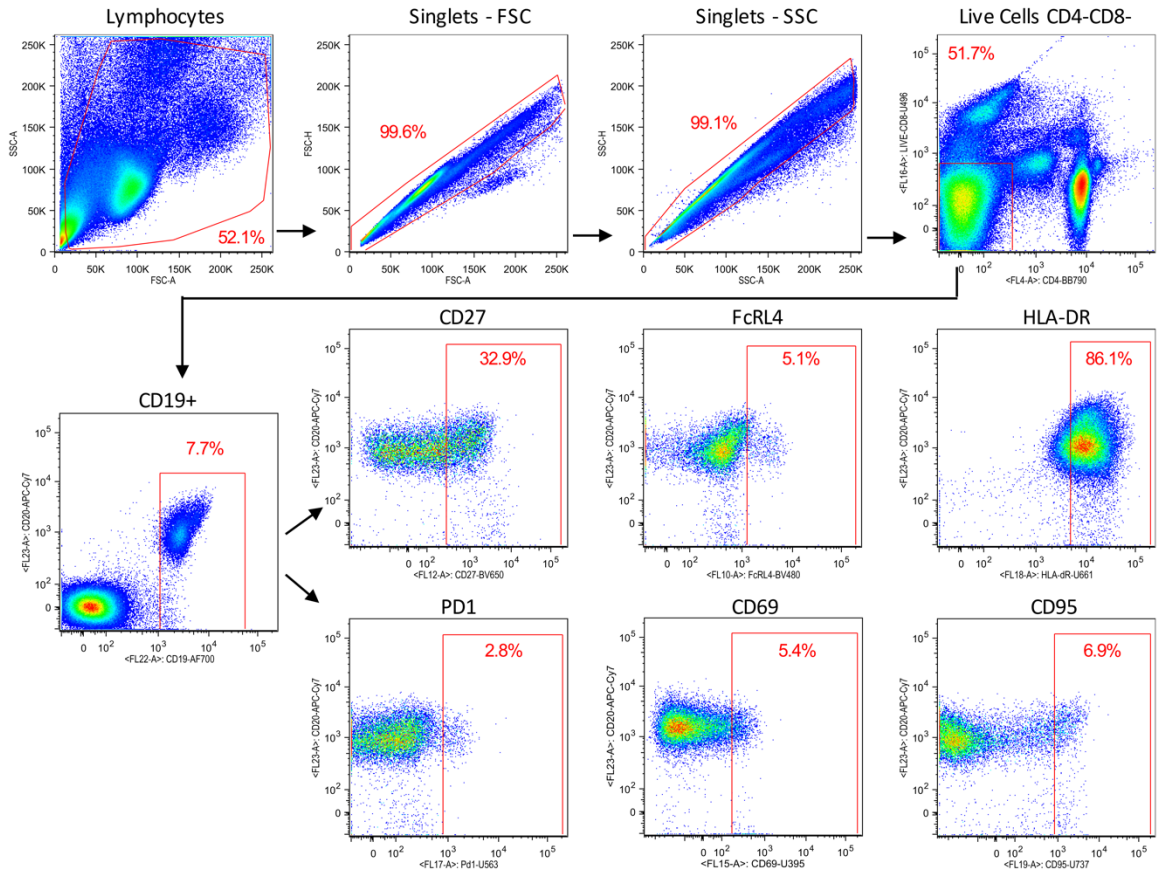

**Supplemental Figure 8: B-Cell Panel Gating Strategy**



**Supplemental Table 1: Linear Model Analyses for immune subsets analysis**

| Cell Type       | Group 1 | Group 2 | Wilcoxon               | LM- Hosp               | LM- Age                | LM- Sex              | LM- Race |
|-----------------|---------|---------|------------------------|------------------------|------------------------|----------------------|----------|
| CD8 T cells     | H       | NH      | <b><i>0.0027</i></b>   | <b><i>0.0003</i></b>   | <b><i>7.94E-06</i></b> | 0.6978               | 0.1865   |
| B cells         | CoV-    | NH      | <b><i>0.0024</i></b>   | <b><i>0.0036</i></b>   | 0.4940                 | 0.4893               | 0.1070   |
|                 | H       | NH      | <b><i>1.56E-05</i></b> | <b><i>1.22E-06</i></b> | 0.5228                 | 0.0965               | 0.1021   |
| DP NK cells     | CoV-    | H       | <b><i>0.0230</i></b>   | 0.3208                 | 0.1493                 | 0.1012               | 0.0627   |
|                 | H       | NH      | <b><i>0.0107</i></b>   | <b><i>0.0351</i></b>   | <b><i>0.0102</i></b>   | <b><i>0.0067</i></b> | 0.2777   |
| CD56+ NK cells  | H       | NH      | <b><i>0.0088</i></b>   | 0.0563                 | 0.6037                 | 0.5296               | 0.4241   |
| CD16+ monocytes | H       | NH      | <b><i>0.0125</i></b>   | 0.7951                 | 0.4154                 | <b><i>0.0097</i></b> | 0.7160   |
| DP monocytes    | CoV-    | NH      | <b><i>0.0325</i></b>   | 0.7611                 | 0.2103                 | 0.5789               | 0.8263   |
| CD14+ monocytes | CoV-    | H       | <b><i>0.0007</i></b>   | 0.1312                 | 0.4969                 | 0.7939               | 0.7411   |
|                 | H       | NH      | <b><i>0.0042</i></b>   | 0.6029                 | 0.9797                 | 0.4185               | 0.7380   |
| Dendritic cells | CoV-    | H       | <b><i>0.0029</i></b>   | 0.1139                 | 0.7283                 | 0.9036               | 0.9535   |
|                 | CoV-    | NH      | <b><i>0.0071</i></b>   | 0.1071                 | 0.1237                 | 0.1013               | 0.4518   |

Note: Wilcoxon: p-values as determined by Wilcoxon rank sum test; LM: p-values determined by ANOVA after linear modeling. Hosp = Hospital Status (Hospitalized/Non-hospitalized/Healthy). Significance determined by  $p \leq 0.05$  and indicated by bold and italics.

**Supplemental Table 2: Linear Model Analyses for T-Cell/B-Cell Activation and Exhaustion Markers**

| Subset | Marker | Group 1 | Group 2              | Wilcoxon                | LM- Hosp               | LM- Age              | LM- Sex              | LM- Race             |
|--------|--------|---------|----------------------|-------------------------|------------------------|----------------------|----------------------|----------------------|
| CD4    | CD69   | CoV-    | H                    | <i><b>8.46E-05</b></i>  | <i><b>0.0045</b></i>   | 0.1915               | 0.7189               | 0.3266               |
|        |        | H       | NH                   | <i><b>0.0002</b></i>    | <i><b>0.0003</b></i>   | 0.1330               | 0.8110               | 0.1785               |
|        | Ox40   | CoV-    | H                    | <i><b>0.0002</b></i>    | <i><b>0.0104</b></i>   | 0.3329               | 0.2542               | 0.8825               |
|        |        | H       | NH                   | <i><b>0.0002</b></i>    | <i><b>0.0007</b></i>   | 0.6612               | <i><b>0.0337</b></i> | 0.9735               |
|        | PD1    | CoV-    | H                    | <i><b>0.0003</b></i>    | <i><b>0.0074</b></i>   | 0.2850               | 0.9485               | <i><b>0.0384</b></i> |
|        |        | H       | NH                   | <i><b>0.0049</b></i>    | <i><b>0.0036</b></i>   | <i><b>0.0193</b></i> | 0.9096               | <i><b>0.0288</b></i> |
|        | HLADR  | H       | NH                   | <i><b>0.0090</b></i>    | <i><b>0.0065</b></i>   | <i><b>0.0194</b></i> | 0.7144               | 0.0928               |
|        | CD154  | H       | NH                   | <i><b>0.0278</b></i>    | <i><b>0.0171</b></i>   | 0.0705               | 0.0583               | 0.0780               |
|        | Tim3   | H       | NH                   | <i><b>0.0473</b></i>    | <i><b>0.0107</b></i>   | 0.6969               | 0.0792               | 0.7506               |
|        | TIGIT  | CoV-    | H                    | <i><b>2.56E-05</b></i>  | <i><b>0.0026</b></i>   | 0.2814               | 0.9019               | 0.0849               |
|        |        | CoV-    | NH                   | <i><b>2.70E-05</b></i>  | <i><b>3.99E-05</b></i> | <i><b>0.0437</b></i> | 0.0731               | 0.7789               |
|        | PDL1   | CoV-    | H                    | <i><b>0.0072</b></i>    | <i><b>0.0337</b></i>   | 0.2979               | 0.9511               | 0.5307               |
|        |        | CoV-    | NH                   | <i><b>0.0031</b></i>    | <i><b>0.0035</b></i>   | 0.7585               | 0.9496               | 0.3551               |
| CD38   | H      | NH      | <i><b>0.0305</b></i> | <i><b>0.0407</b></i>    | <i><b>0.0071</b></i>   | 0.6066               | 0.3370               |                      |
| CD8    | CD69   | CoV-    | H                    | <i><b>8.24E-05</b></i>  | <i><b>0.0376</b></i>   | <i><b>0.0112</b></i> | 0.1524               | 0.2504               |
|        |        | H       | NH                   | <i><b>0.0001</b></i>    | <i><b>0.0166</b></i>   | 0.1567               | 0.1669               | 0.4386               |
|        | CD38   | CoV-    | H                    | <i><b>0.0019428</b></i> | <i><b>0.0102</b></i>   | 0.8129               | 0.3883               | 0.6824               |
|        |        | H       | NH                   | <i><b>7.93E-05</b></i>  | <i><b>8.04E-05</b></i> | 0.6010               | 0.2347               | 0.4981               |
|        | Ox40   | H       | NH                   | <i><b>0.0331</b></i>    | <i><b>0.0185</b></i>   | <i><b>0.0215</b></i> | 0.1226               | 0.0763               |
|        | CD154  | H       | NH                   | <i><b>0.0128</b></i>    | 0.0674                 | 0.5114               | 0.7558               | 0.8356               |
|        | HLADR  | H       | NH                   | <i><b>0.0047</b></i>    | <i><b>0.0141</b></i>   | 0.1424               | 0.3045               | 0.6171               |
|        | Tim3   | H       | NH                   | <i><b>0.0043</b></i>    | <i><b>0.0018</b></i>   | 0.4180               | <i><b>0.0098</b></i> | 0.1833               |
|        | PDL1   | CoV-    | H                    | <i><b>0.0012</b></i>    | 0.1758                 | 0.3393               | 0.1779               | 0.7140               |
|        |        | H       | NH                   | <i><b>0.0003</b></i>    | 0.0617                 | 0.6121               | 0.0885               | 0.7529               |
| B      | CD69   | CoV-    | H                    | <i><b>7.03E-06</b></i>  | <i><b>0.0025</b></i>   | <i><b>0.0133</b></i> | 0.1358               | 0.1530               |
|        |        | CoV-    | NH                   | <i><b>0.0004</b></i>    | <i><b>0.0074</b></i>   | 0.0676               | 0.5787               | 0.1595               |
|        |        | H       | NH                   | <i><b>0.0390</b></i>    | <i><b>0.0254</b></i>   | <i><b>0.0063</b></i> | 0.1872               | 0.1428               |
|        | CD95   | CoV-    | H                    | <i><b>0.0207</b></i>    | <i><b>0.0089</b></i>   | <i><b>0.0225</b></i> | 0.6015               | 0.1436               |
|        |        | H       | NH                   | <i><b>0.0339</b></i>    | 0.1545                 | <i><b>0.0108</b></i> | 0.2239               | 0.1940               |
|        | HLADR  | H       | NH                   | <i><b>0.0508</b></i>    | <i><b>0.0317</b></i>   | 0.6440               | 0.6904               | 0.6224               |
|        | CD27   | CoV-    | NH                   | <i><b>0.0042</b></i>    | <i><b>0.0020</b></i>   | <i><b>0.0321</b></i> | 0.5078               | 0.9163               |
|        | PD1    | CoV-    | NH                   | <i><b>0.0162</b></i>    | 0.0797                 | 0.8880               | 0.9663               | 0.6753               |
| H      |        | NH      | <i><b>0.0264</b></i> | <i><b>0.0301</b></i>    | 0.8937                 | 0.9812               | 0.7671               |                      |

Note: Wilcoxon: p-values as determined by Wilcoxon rank sum test; LM: p-values determined by ANOVA after linear modeling. Hosp = Hospital Status (Hospitalized/Non-hospitalized/Healthy). Significance determined by  $p \leq 0.05$  and indicated by bold and italics.

**Supplemental Table 3: Linear Model Analyses for T-Cell/B-Cell Activation and Exhaustion Markers in Hospitalized Patients based on ICU vs No ICU**

| Subset | Marker | Group 1 | Group 2 | Wilcoxon             | LM- Hosp             | LM- Age | LM- Sex | LM- Race |
|--------|--------|---------|---------|----------------------|----------------------|---------|---------|----------|
| B      | CD27   | ICU     | No ICU  | <b><i>0.0288</i></b> | 0.0659               | 0.3587  | 0.9852  | 0.4125   |
|        | CD95   | ICU     | No ICU  | <b><i>0.0547</i></b> | 0.1801               | 0.1182  | 0.0989  | 0.2775   |
|        | HLADR  | ICU     | No ICU  | <b><i>0.0451</i></b> | <b><i>0.0333</i></b> | 0.9502  | 0.6012  | 0.6356   |
| CD4    | CD69   | ICU     | No ICU  | <b><i>0.0044</i></b> | <b><i>0.0245</i></b> | 0.3295  | 0.7362  | 0.4688   |
|        | CD38   | ICU     | No ICU  | <b><i>0.0497</i></b> | <b><i>0.0372</i></b> | 0.0679  | 0.8076  | 0.1868   |
| CD8    | CD137  | ICU     | No ICU  | <b><i>0.0018</i></b> | <b><i>0.0128</i></b> | 0.3691  | 0.4160  | 0.7974   |
|        | PDL1   | ICU     | No ICU  | <b><i>0.0176</i></b> | 0.1368               | 0.7283  | 0.1886  | 0.8374   |
|        | CD38   | ICU     | No ICU  | <b><i>0.0249</i></b> | 0.0564               | 0.8979  | 0.6325  | 0.4485   |

Note: Wilcoxon: p-values as determined by Wilcoxon rank sum test; LM: p-values determined by ANOVA after linear modeling. Hosp = Hospital Status (Hospitalized/Non-hospitalized/Healthy). Significance determined by  $p \leq 0.05$  and indicated by bold and italics.

**Supplemental Table 4: Flow Cytometry Panels**

|                                      | <b>Fluorophore</b> | <b>Antigen</b> | <b>Clone</b> | <b>Manufacturer</b> |
|--------------------------------------|--------------------|----------------|--------------|---------------------|
| <b>Immunopheno-<br/>typing Panel</b> | FITC               | CD16           | CB16         | Invitrogen          |
|                                      | Percpcy5.5         | CD19           | SJ25C1       | BD Biosciences      |
|                                      | PE                 | HLA-DR         | G46-6        | BD Biosciences      |
|                                      | PE Alexa 610       | CD27           | 0323         | Invitrogen          |
|                                      | PeCy7              | CD45           | HI30         | BD Biosciences      |
|                                      | BV421              | CD56           | NCAM16.2     | BD Biosciences      |
|                                      | V500               | CD8            | RPA-T8       | BD Biosciences      |
|                                      | BV785              | CD4            | SK3          | Biolegend           |
|                                      | A700               | CD14           | M5E2         | BD Biosciences      |
|                                      | A780               | CD3            | UCHT1        | Invitrogen          |
| <b>T-cell Panel #1</b>               | V500               | CD8            | RPA-T8       | BD Biosciences      |
|                                      | BV711              | CD3            | UCHT1        | BD Biosciences      |
|                                      | BV786              | CD4            | SK3          | BD Biosciences      |
|                                      | BUV737             | CD38           | HB7          | BD Biosciences      |
|                                      | APC                | CD28           | CD28.2       | BD Biosciences      |
| <b>T-cell Panel #2</b>               | PerCpCy5.5         | TIGIT          | A15153G      | Biolegend           |
|                                      | PE                 | PDL1           | MIH1         | BD Biosciences      |
|                                      | PE Alexa 610       | CD4            | S3.5         | Life Technologies   |
|                                      | Pecy7              | Ox40           | Ber-ACT35    | Biolegend           |
|                                      | BV421              | Tim3           | F38-2E2      | Biolegend           |
|                                      | V500               | CD8            | RPA-T8       | BD Biosciences      |
|                                      | BV650              | CD137          | 4B4-1        | BD Biosciences      |
|                                      | BV785              | PD1            | EH12.2H7     | Biolegend           |
|                                      | BUV563             | CD14           | MΦP9         | BD Biosciences      |
|                                      | BUV563             | CD19           | SJ25C1       | BD Biosciences      |
|                                      | APC                | CD154          | TRAP1        | BD Biosciences      |
|                                      | A780               | CD3            | UCHT1        | Invitrogen          |
| <b>B-cell Panel</b>                  | BB790              | CD4            | L200         | BD Biosciences      |
|                                      | AF700              | CD19           | J3-119       | Beckman Coulter     |
|                                      | BV 480             | FcRL4          | A1           | BD Biosciences      |
|                                      | BV 650             | CD27           | O323         | Biolegend           |
|                                      | BUV395             | CD69           | FN-50        | BD Biosciences      |
|                                      | BUV496             | CD8            | RPA-T8       | BD Biosciences      |
|                                      | BUV563             | PD-1           | MIH18        | BD Biosciences      |
|                                      | BUV661             | HLA-DR         | G46-6        | BD Biosciences      |
|                                      | BUV737             | CD95           | DX2          | BD Biosciences      |
